# Supplementary material for: Revisiting the factors influencing the magnetic resonance contrast of Gd2O3 nanoparticles
Source: Royal Society of Chemistry journal article supplement (doi:10.1039/d1na00612f), 2021-10-25
Supplement: d1na00612f1.pdf [file d1na00612f1.pdf]

## Electronic Supplementary Information

### Revisiting the factors influencing magnetic resonance contrast of $\text{Gd}_2\text{O}_3$ nanoparticles

Yanyue Liu,<sup>a</sup> Yingfan Dai,<sup>a</sup> Haifeng Li,<sup>a</sup> Dida Duosiken,<sup>a</sup> Na Tang,<sup>a</sup> Kang Sun,<sup>a</sup> and Ke Tao<sup>\*a</sup>

*a. State Key Lab of Metal Matrix Composites, School of Materials Science and Engineering, Shanghai Jiao Tong University, Shanghai 200240, P. R. China.*

\*Corresponding Author: ktao@sjtu.edu.cn

Figure S1.

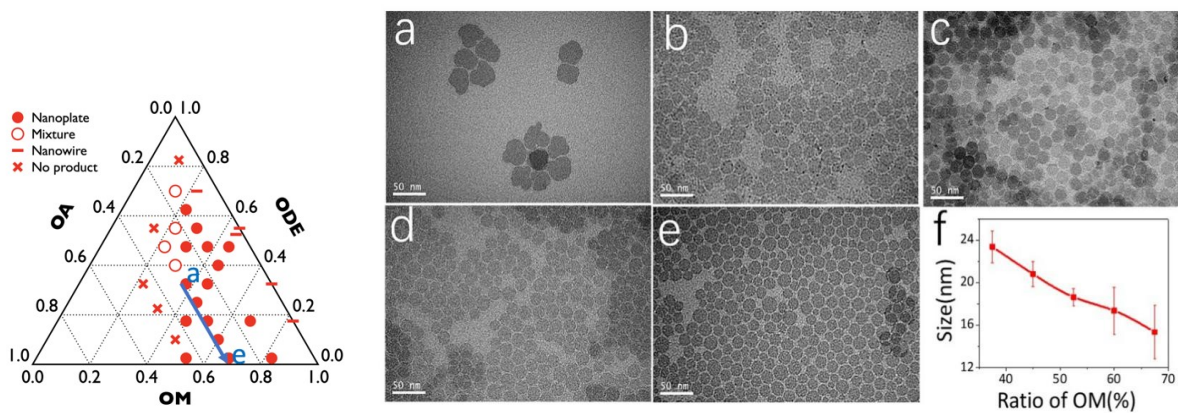

Figure S1. The influence of OM percentage on the size of nanoplate, images a-e corresponded to the five dots on blue arrow in left panel (OM = 37.5%, 45%, 52.5%, 60% and 67.5%), respectively, and OA was fixed as 30%. A plot (f) presented their size evolution.

Figure S2.

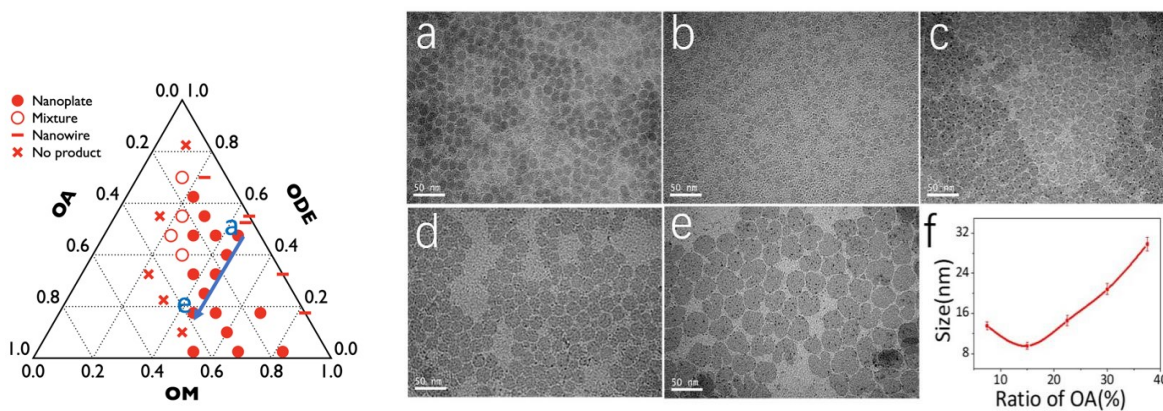

Figure S2. The influence of OA percentage on the size of nanoplate, images a-e corresponded to the five dots on blue arrow in left panel (OA = 7.5%, 15%, 22.5%, 30% and 37.5%), respectively, and OM was fixed as 45%. Notably, Fig. S2d=Fig. S1b. A plot (f) presented their size evolution.

Figure S3.

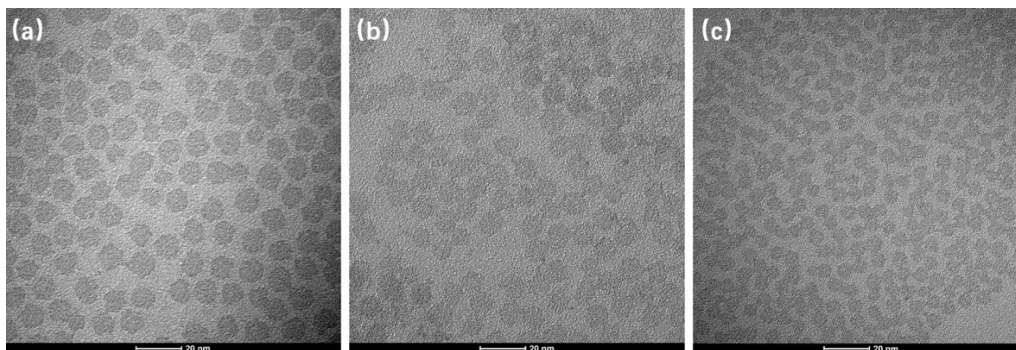

Figure S3. TEM images of decomposing a) 800mg, b)1200mg and c)1600mg Gd-oleate precursor in a mixture of 6mL OA, 36mL OM and 38mL ODE under 320°C for 1h.

Figure S4.

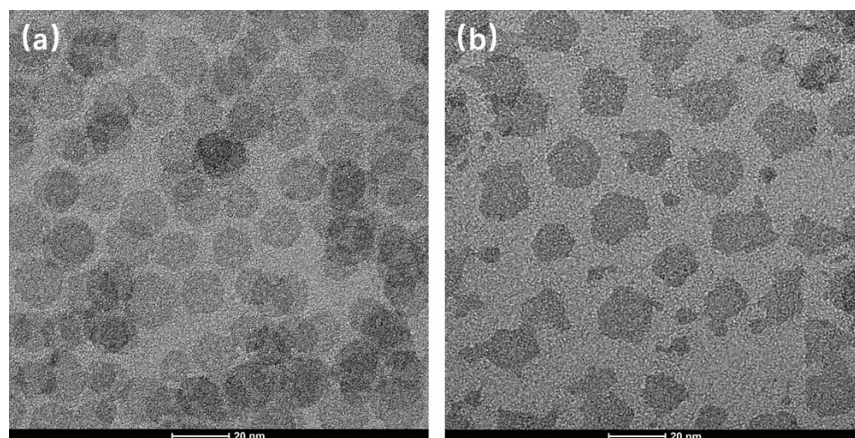

Figure S4. TEM images of sample a) GON17-a and b) GON17-b, the latter one was prepared by directly heating the mixture NaOL and  $GdCl_3$  in OA/OM/ODE without preparing the precursor.

Figure S5

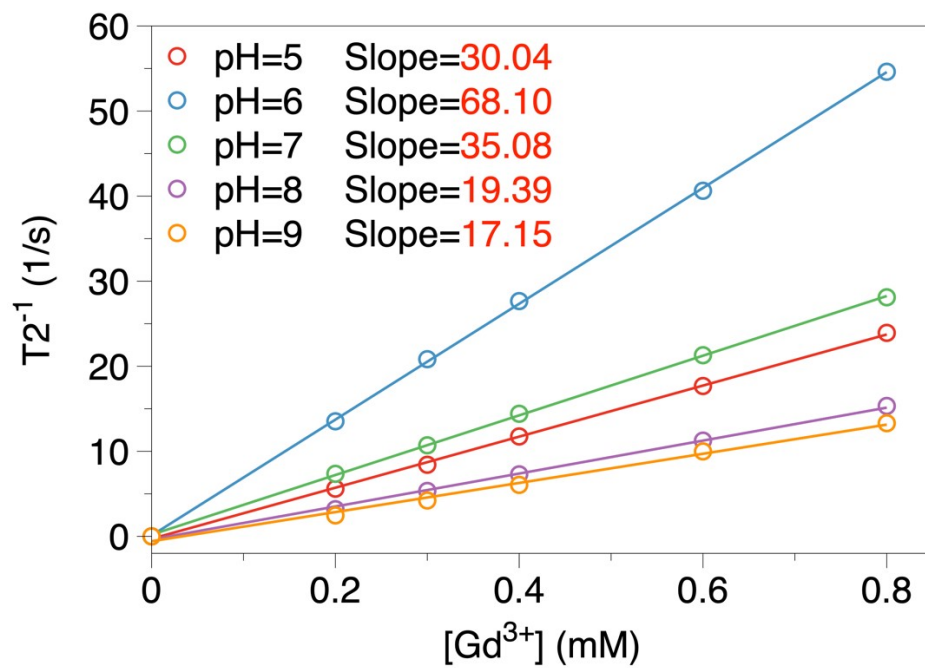

Figure S5.  $1/T_2$  of the sample GON5-a-PAA5000 in the environment of different pH.

Table S1. Relaxivities  $r_1$ ,  $r_2$  and  $r_1/r_2$  ratios of the GONs from the slopes of the plot of  $1/T$  and concentration of  $Gd^{3+}$  at 0.5 T.

| Sample nomenclature | $r_1$ ( $mM^{-1}\cdot s^{-1}$ ) | $r_2$ ( $mM^{-1}\cdot s^{-1}$ ) | $r_2 / r_1$ |
|---------------------|---------------------------------|---------------------------------|-------------|
| Gd-DTPA             | 4.458                           | 5.037                           | 1.13        |
| GON 5-a-CA          | 14.207                          | 15.801                          | 1.11        |
| GON 5-a-PAA2000     | 26.350                          | 31.795                          | 1.21        |
| GON 5-a-PAA2000-RGD | 27.199                          | 32.037                          | 1.18        |
| GON 5-a-PAA5000-RGD | 30.539                          | 35.081                          | 1.15        |
| GON 5-a-PAA5000     | 33.519                          | 37.493                          | 1.12        |
| GON 5-a- PAM        | 3.311                           | 6.193                           | 1.87        |
| GON 5-a-APTS        | 0.140                           | 0.943                           | 6.74        |
| GON 5-b-CA          | 10.045                          | 12.518                          | 1.25        |
| GON 5-c-CA          | 9.414                           | 9.866                           | 1.05        |
| GON 9-a-CA          | 11.061                          | 12.449                          | 1.13        |
| GON 9-a-PAA2000     | 9.359                           | 11.383                          | 1.22        |
| GON 9-a-PAA5000     | 14.793                          | 17.792                          | 1.20        |
| GON 9-a-PAM         | 2.295                           | 5.402                           | 2.35        |
| GON 9-a-APTS        | 0.292                           | 1.518                           | 5.20        |
| GON 9-b-CA          | 8.632                           | 10.212                          | 1.18        |
| GON 17-a-CA         | 9.245                           | 10.986                          | 1.19        |
| GON 17-b-CA         | 7.919                           | 9.083                           | 1.15        |
